# Supplementary material
Source: Springer Nature journal article supplement (https://www.springermedizin.de/resource/supplementary/12884_2012_725_MOESM1_ESM.pdf/9458556)
Supplement: MOESM1 [file 9458556]

## The Bidens Study

Denmark: Women recruited in 2008 – 2009 around week 13 – 20 when attending the hospital for the nuchal scan  
n = 1300

No AHC\* / AHC combined with other abusive experiences  
n = 1214

Only experienced AHC  
n = 86

Suffering 0 – 4  
n = 60  
Suffering 10  
n = 5  
Not stated level of suffering  
n = 5

Suffering 5 - 9  
n = 16

No permission to be further contacted  
n = 1  
Severe mental disease  
n = 1

Invitation send  
n = 14

No response despite reminders  
n = 3

Interviewed  
n = 11

\* Abuse in Health Care
